CORRECTION

# Correction: An Open Receptor-Binding Cavity of Hemagglutinin-Esterase-Fusion Glycoprotein from Newly-Identified Influenza D Virus: Basis for Its Broad Cell Tropism

Hao Song, Jianxun Qi, Zahra Khedri, Sandra Diaz, Hai Yu, Xi Chen, Ajit Varki, Yi Shi, George F. Gao

The affiliation for the seventh author is incorrect. Ajit Varki is not affiliated with #4 but with #3 University of California, San Diego, CA, USA.

The following information is missing from the Funding section: This work was also supported by NIH grants R01GM32373 and U01 CA199792 (to AV).

There are errors in the Author Contributions. The correct contributions are: Conceived and designed the experiments: GFG YS HS JQ. Performed the experiments: HS JQ SD. Analyzed the data: HS JQ YS ZK. Contributed reagents/materials/analysis tools: HS JQ YS HY XC. Wrote the paper: HS AV YS GFG. Collected the X-ray data and solved the structures: JQ. Array analysis and interpretation: ZK SD AV. Synthesis of glycans for array: HY XC.

## Reference

1. Song H, Qi J, Khedri Z, Diaz S, Yu H, Chen X, et al. (2016) An Open Receptor-Binding Cavity of Hemagglutinin-Esterase-Fusion Glycoprotein from Newly-Identified Influenza D Virus: Basis for Its Broad Cell Tropism. *PLoS Pathog* 12(1): e1005411. doi:[10.1371/journal.ppat.1005411](https://doi.org/10.1371/journal.ppat.1005411) PMID: [26816272](https://pubmed.ncbi.nlm.nih.gov/26816272/)

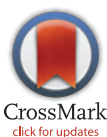

## OPEN ACCESS

**Citation:** Song H, Qi J, Khedri Z, Diaz S, Yu H, Chen X, et al. (2016) Correction: An Open Receptor-Binding Cavity of Hemagglutinin-Esterase-Fusion Glycoprotein from Newly-Identified Influenza D Virus: Basis for Its Broad Cell Tropism. *PLoS Pathog* 12(3): e1005505. doi:[10.1371/journal.ppat.1005505](https://doi.org/10.1371/journal.ppat.1005505)

**Published:** March 8, 2016

**Copyright:** © 2016 Song et al. This is an open access article distributed under the terms of the [Creative Commons Attribution License](https://creativecommons.org/licenses/by/4.0/), which permits unrestricted use, distribution, and reproduction in any medium, provided the original author and source are credited.
